# Supplementary material for: Smurf2 regulates hematopoietic stem cell self-renewal and aging
Source: PubMed Central journal article supplement (PMC4032599; doi:10.1111/acel.12195), 2014-02-04
Supplement: NIHMS550776-supplement-Supp_Fig_S1-S6.pdf [file NIHMS550776-supplement-Supp_Fig_S1-S6.pdf]

**A**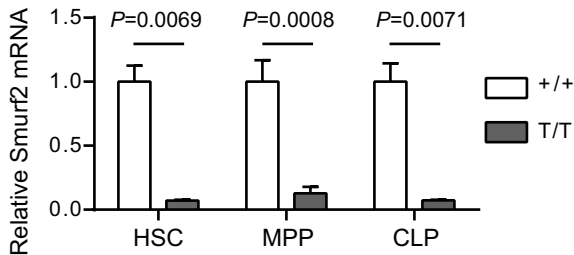**B**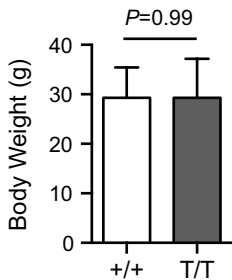**Fig. S1**

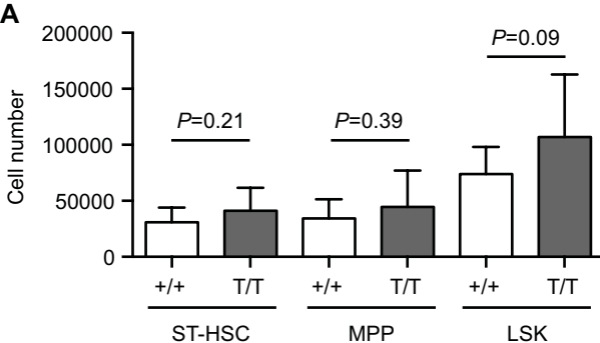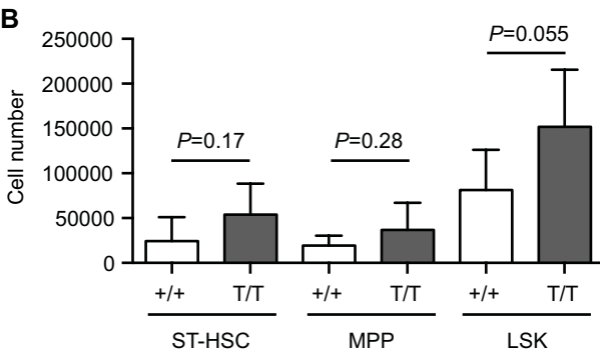

**Fig. S2**

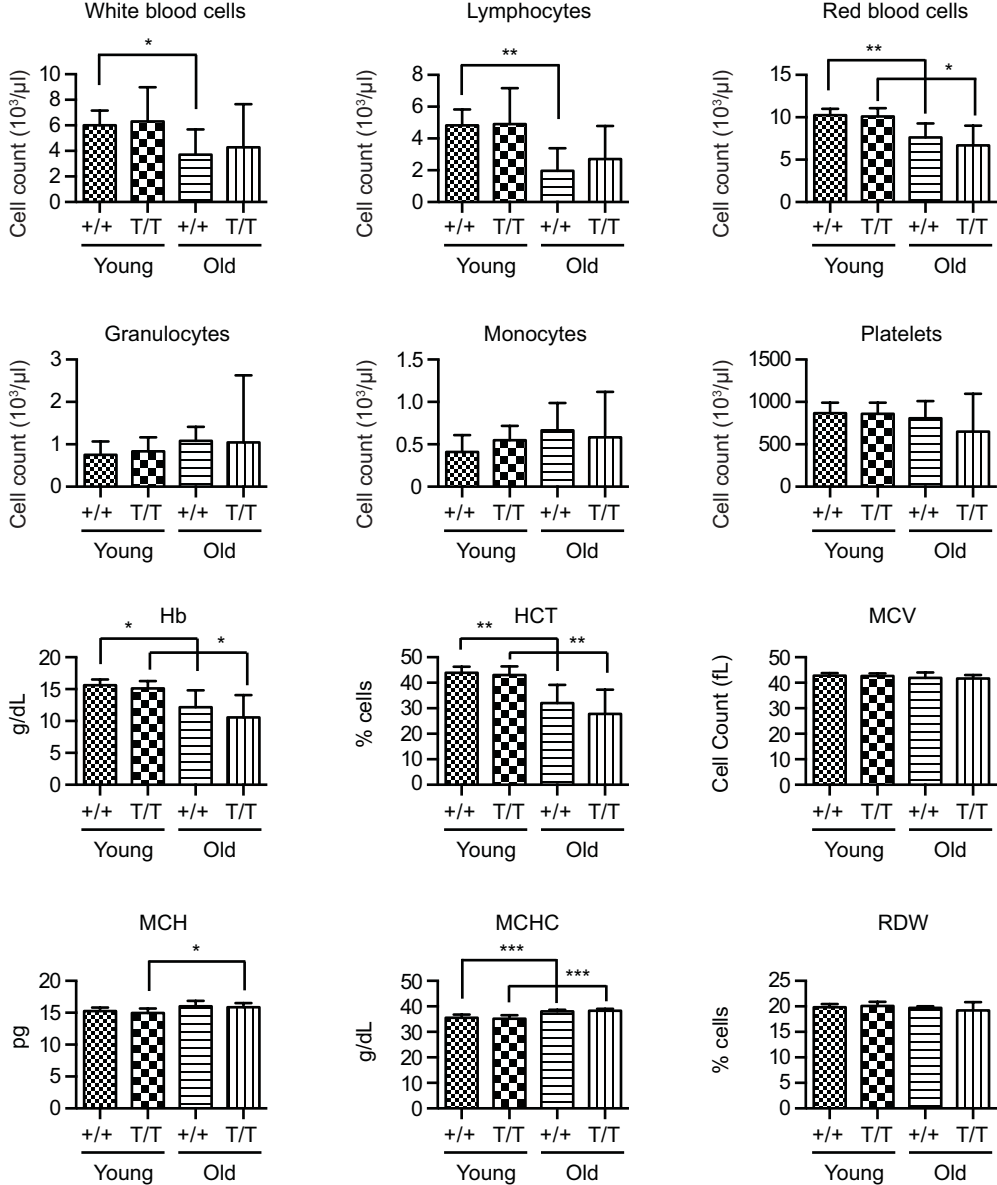

**Fig. S3**

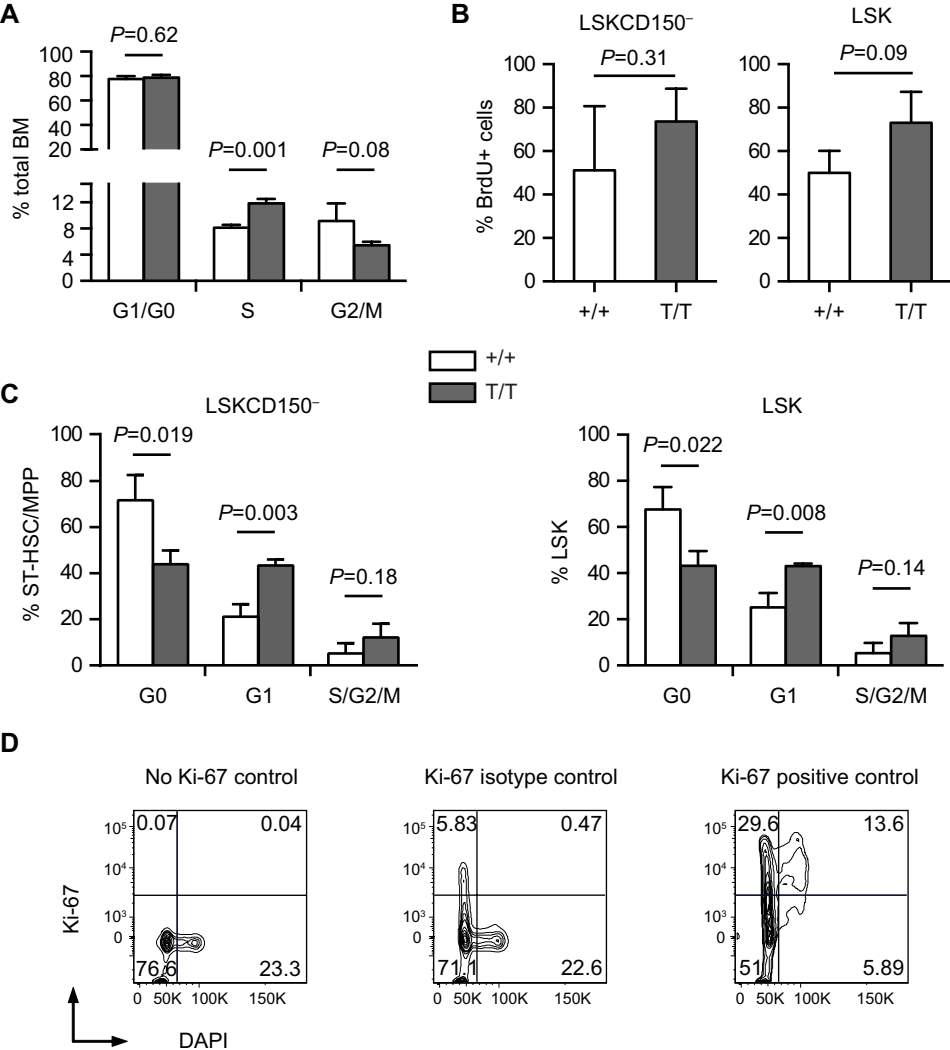

**Fig. S4**

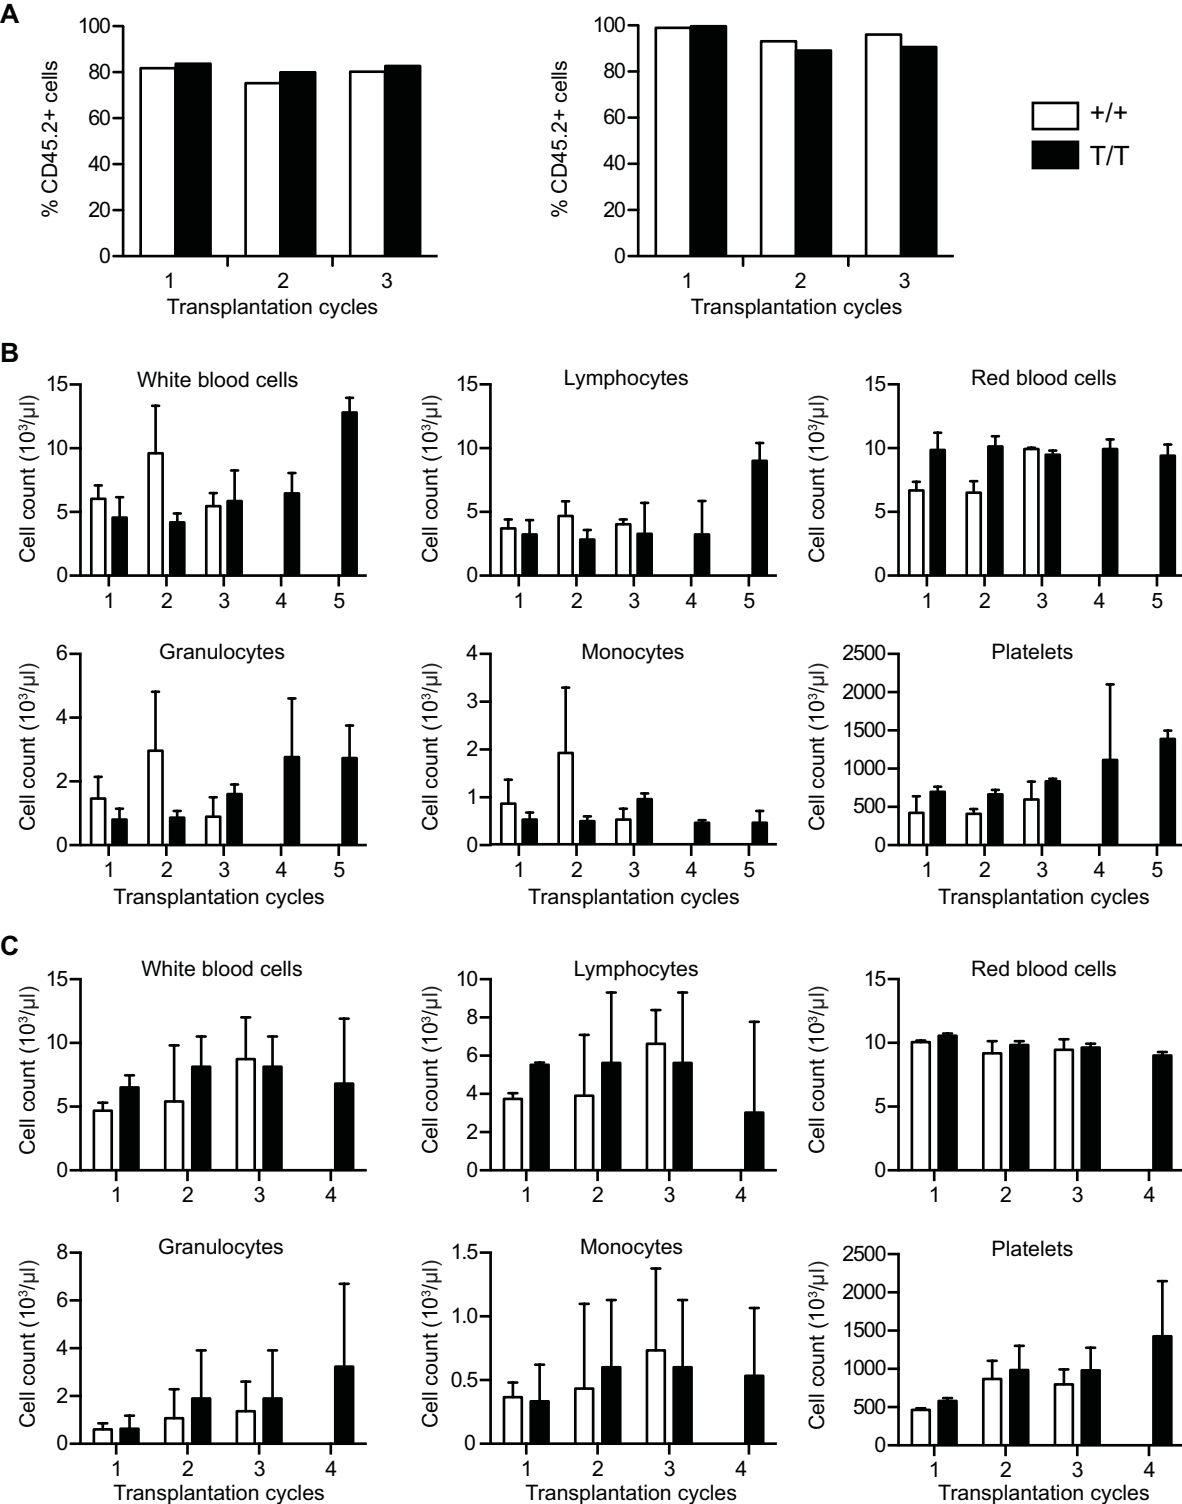

**Fig. S5**

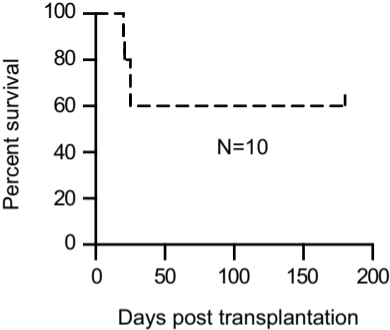

**Fig. S6**
